# Supplementary figures and images for: Symptom evolution following the emergence of maize streak virus
Source: eLife journal article supplement (doi:10.7554/elife.51984), 2020-01-15

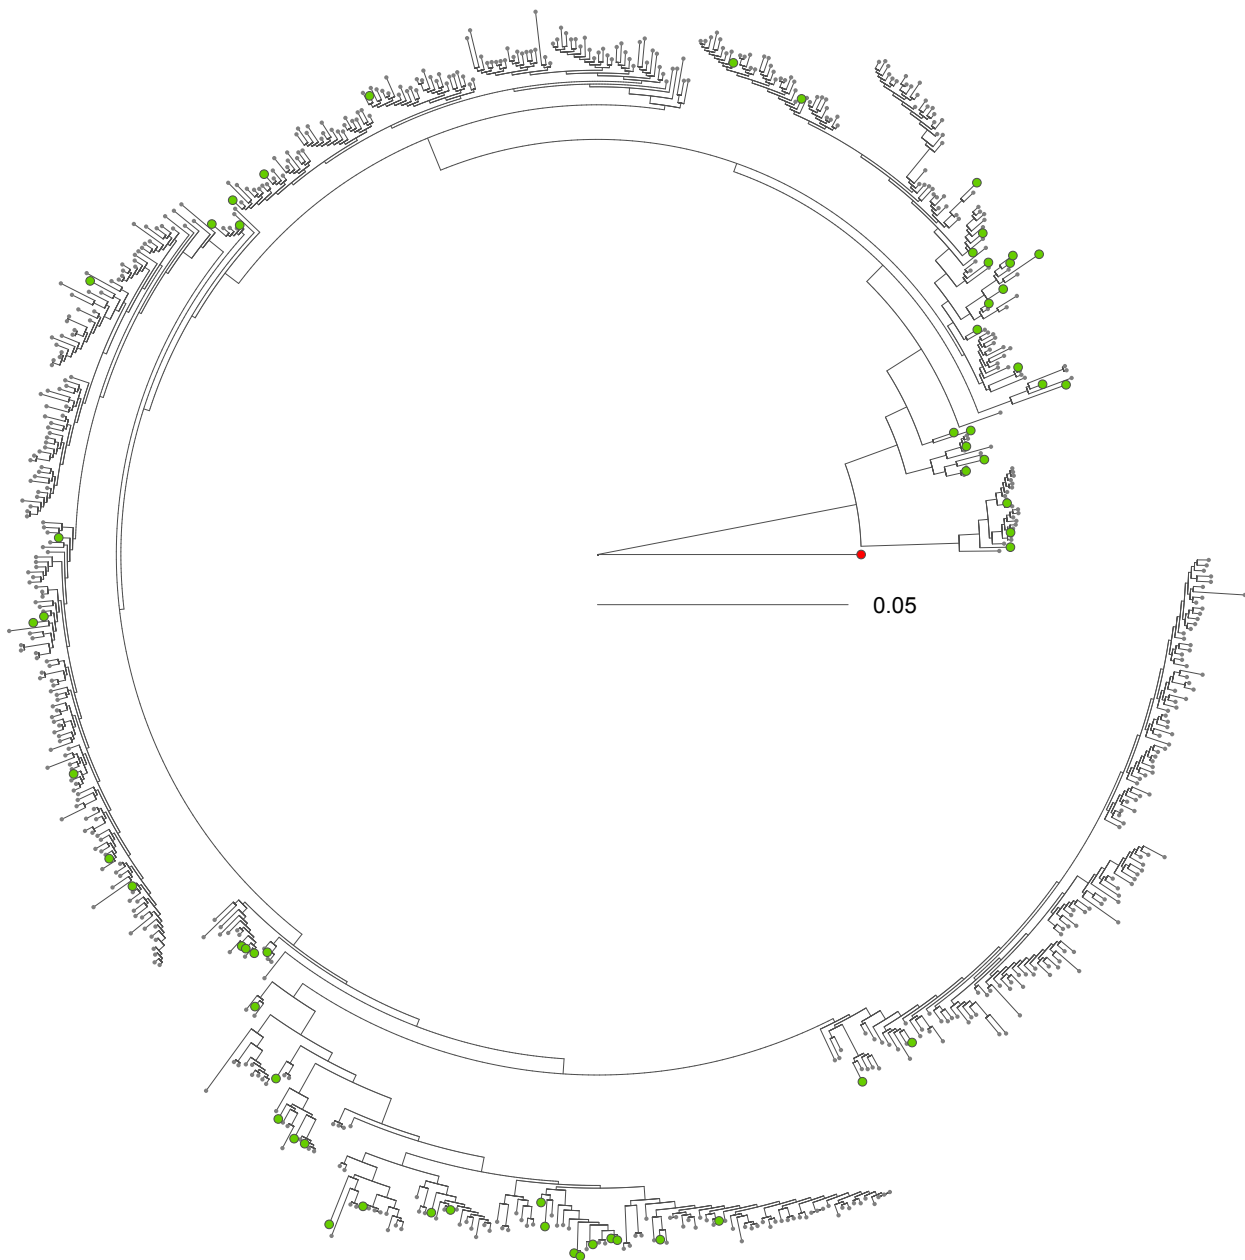

Supplement: supp [file elife-51984-supp-v1.zip]

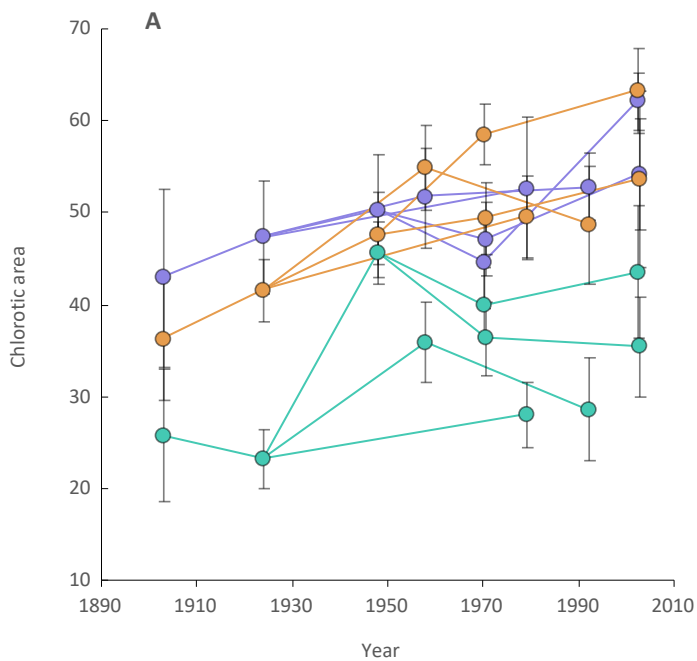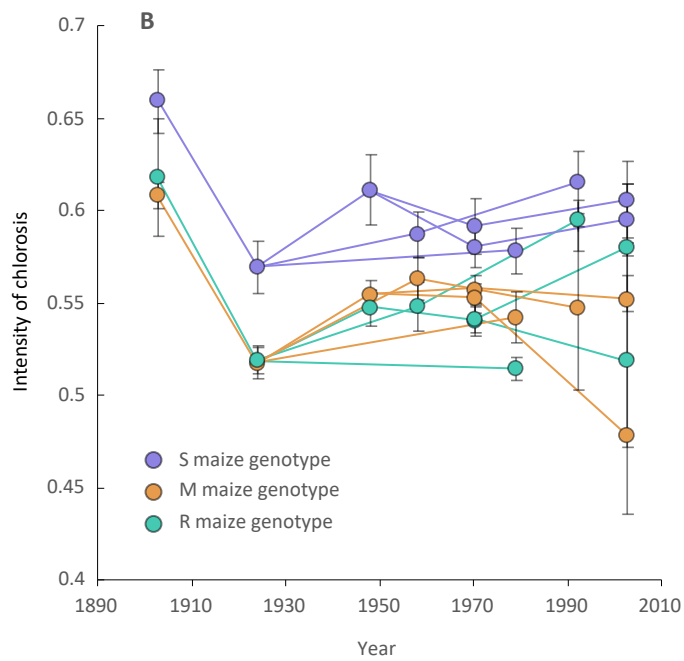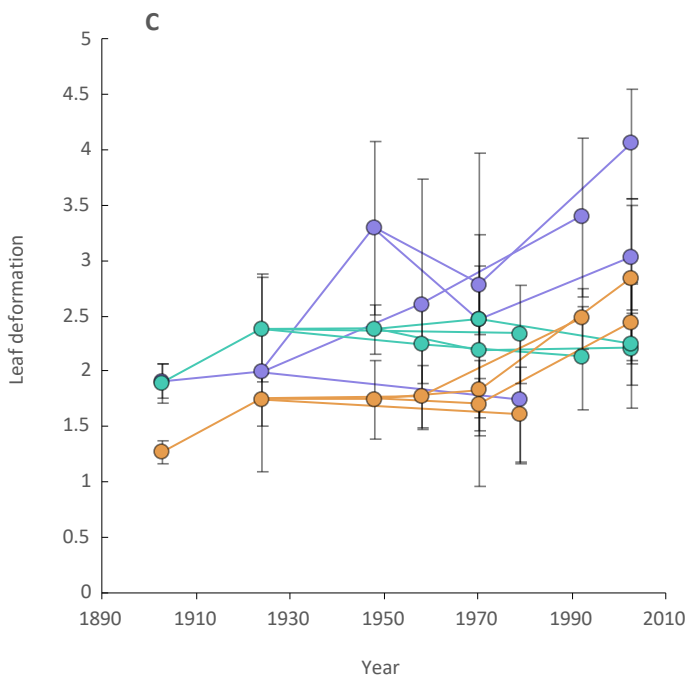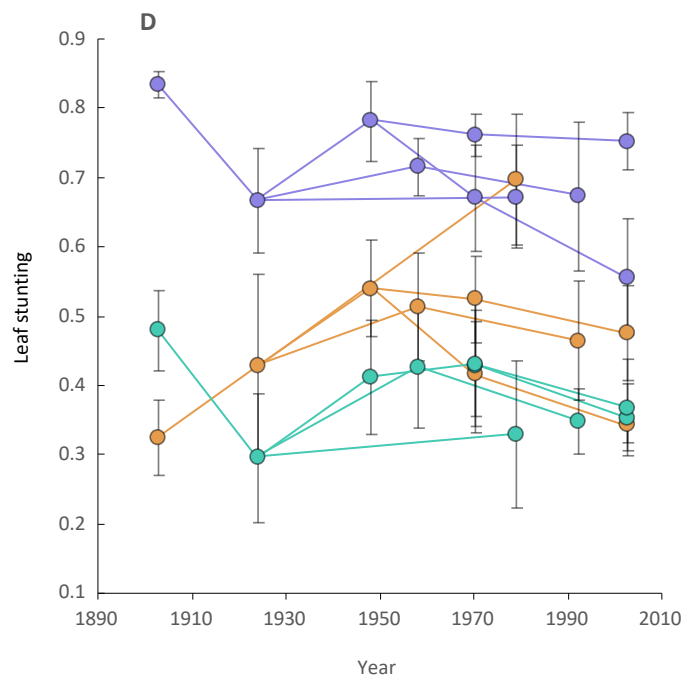

Supplement: supp [file elife-51984-supp-v1.zip]

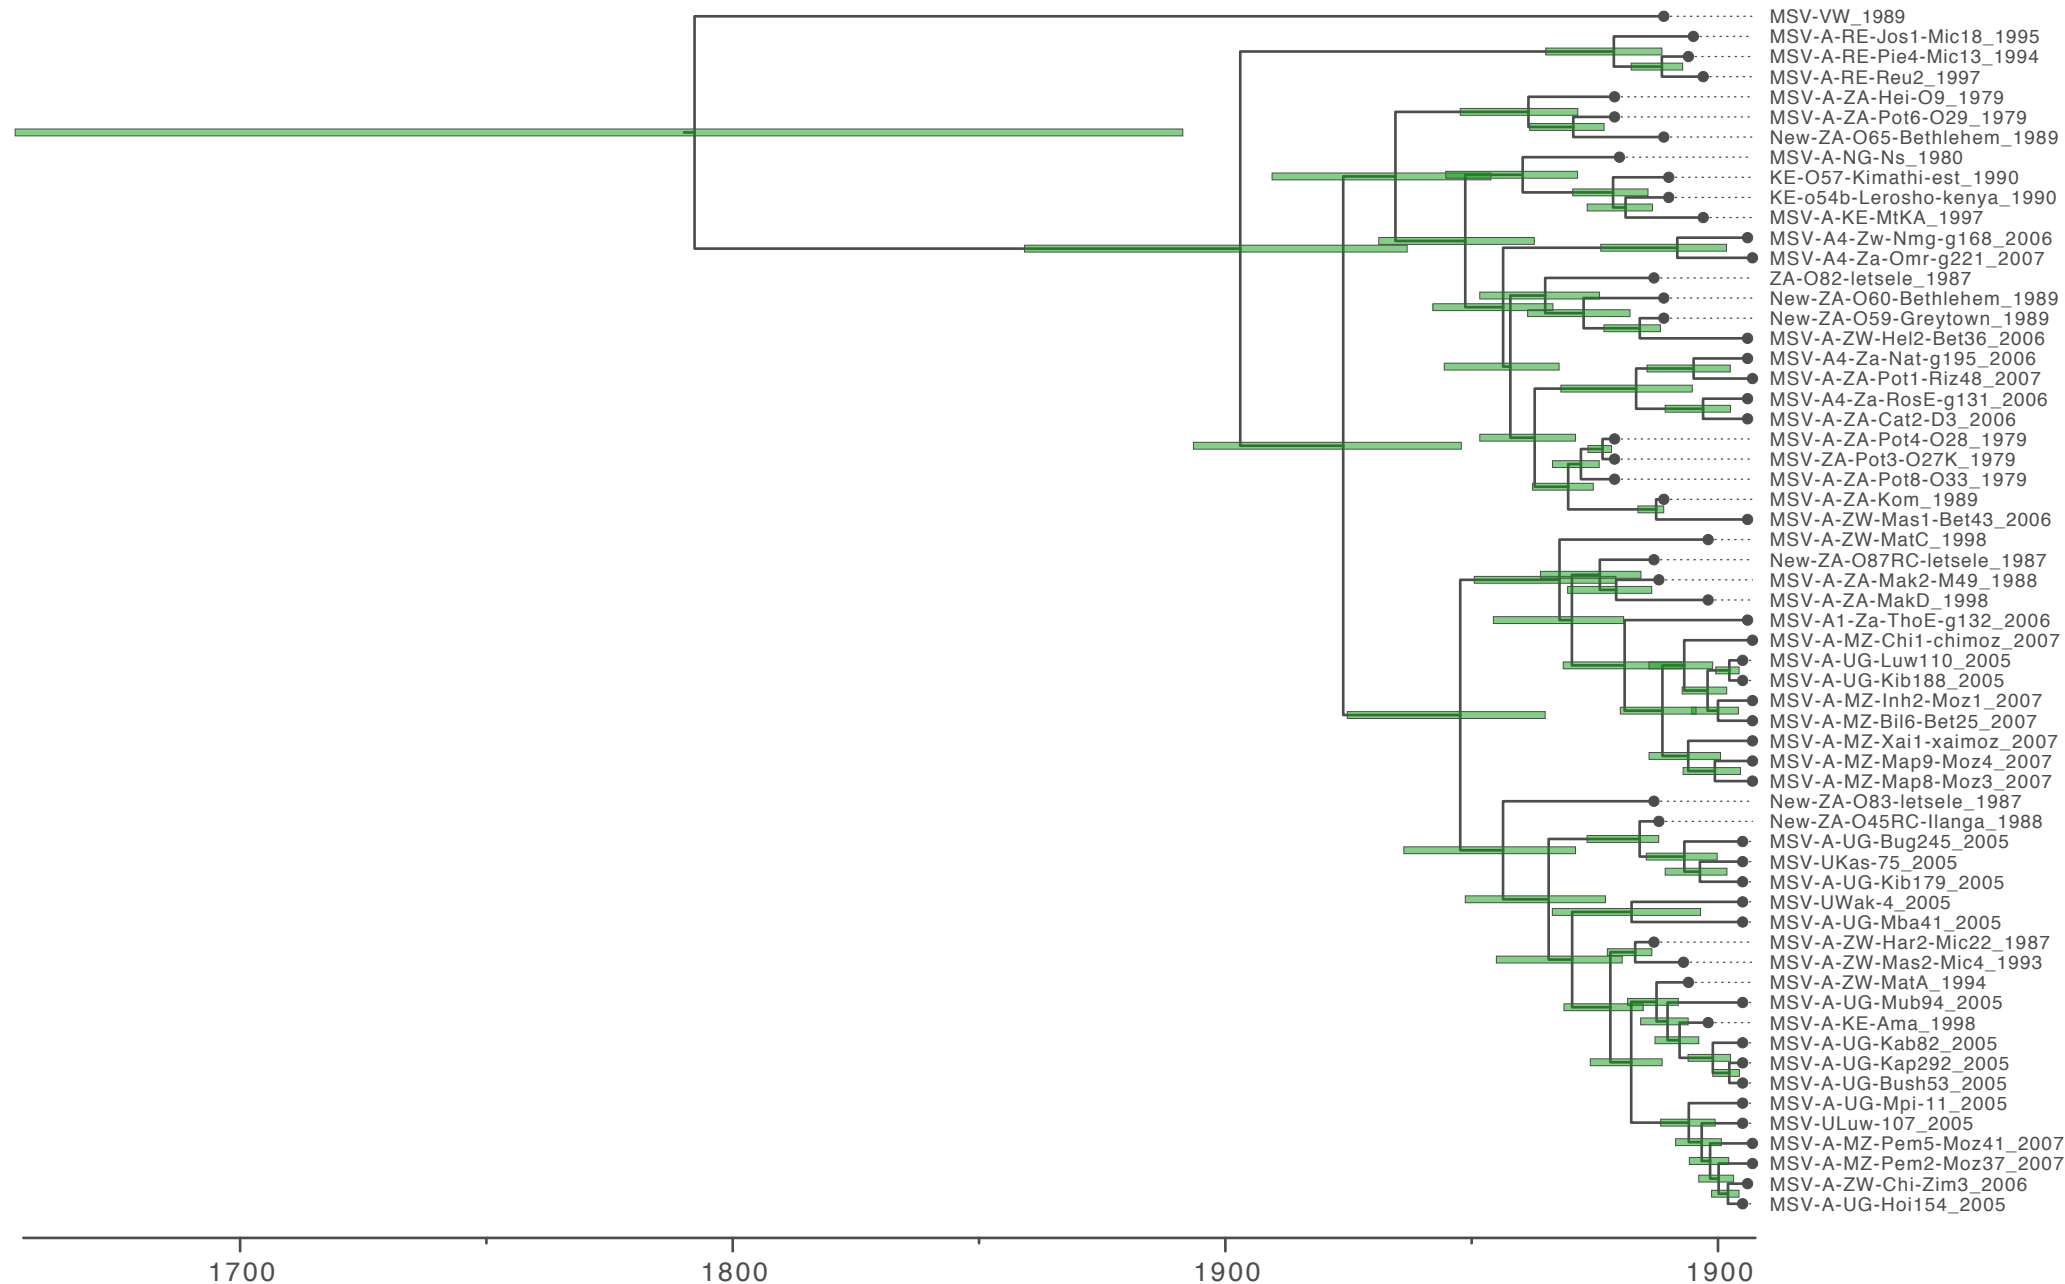

Supplement: supp [file elife-51984-supp-v1.zip]

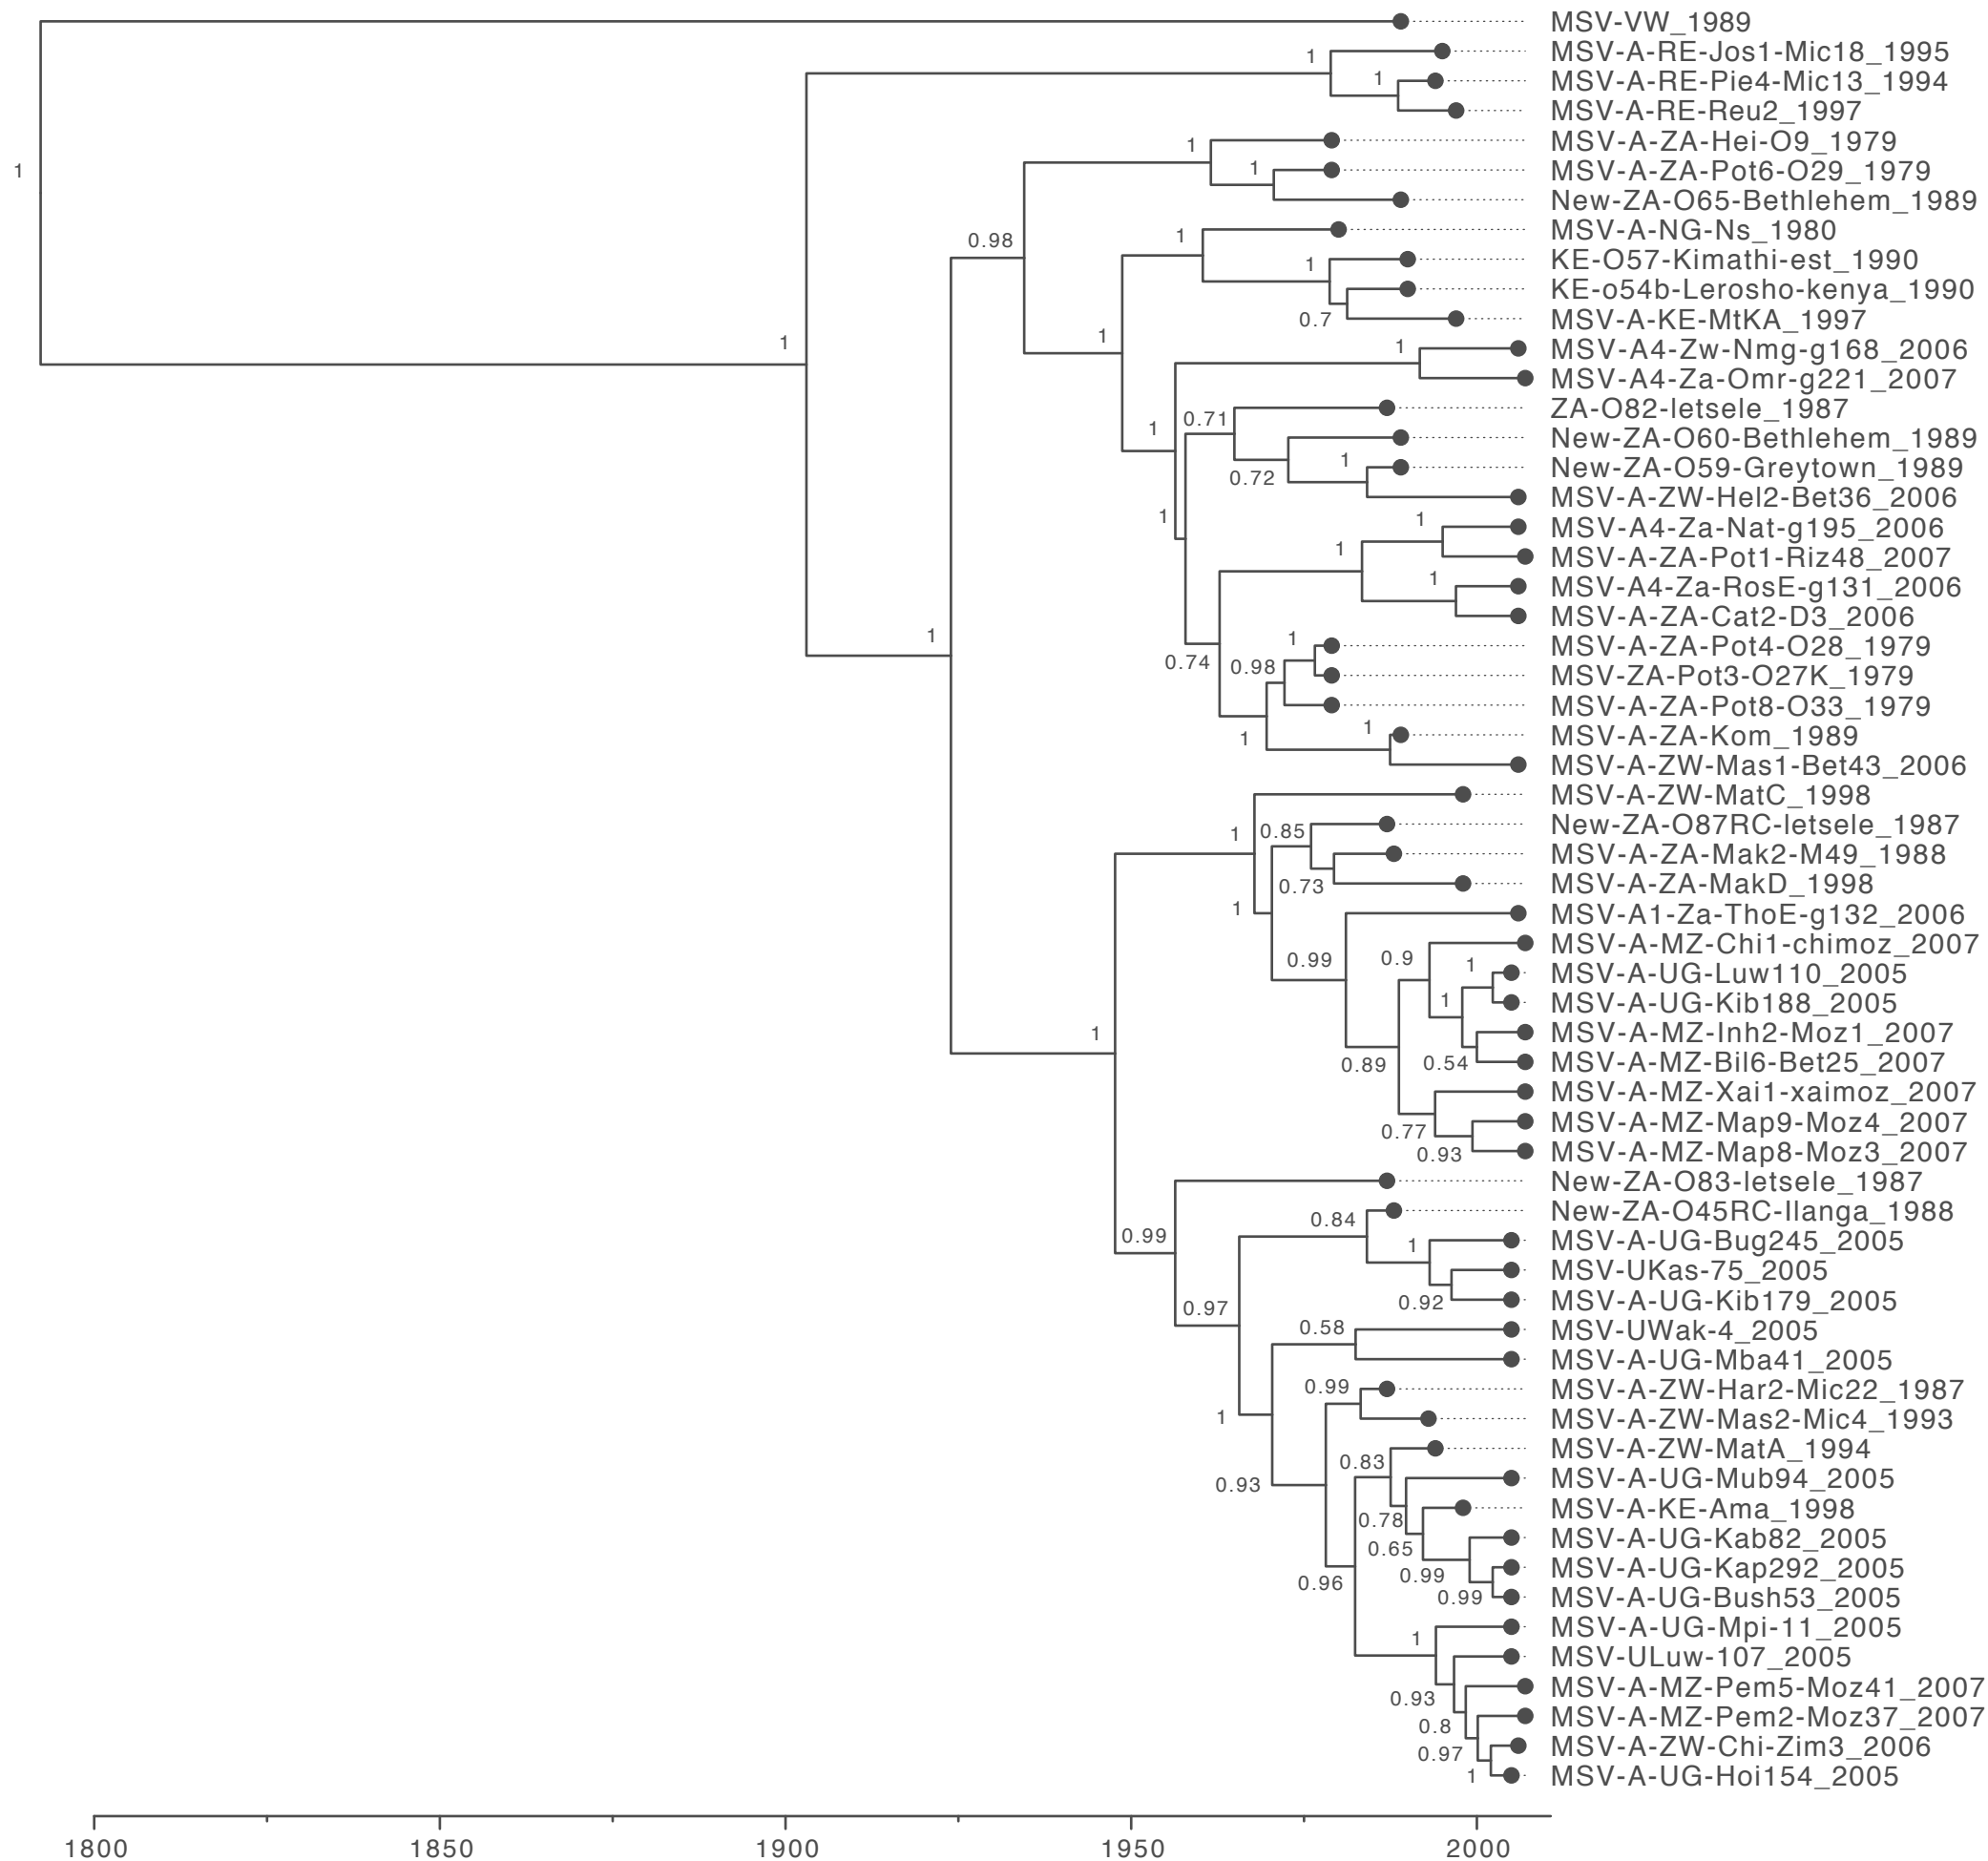

Supplement: supp [file elife-51984-supp-v1.zip]
